# Supplementary material for: Influence of selected inorganic counter-ions on the structure and antimicrobial properties of silver(i) complexes with imidazole-containing ligands
Source: Royal Society of Chemistry journal article supplement (doi:10.1039/c5nj02514a), 2015-11-16

**Influence of selected inorganic counter-ions on the structure and antimicrobial properties of silver(I) complexes with imidazole-containing ligand**

Urszula Kalinowska-Lis,<sup>a,\*</sup> Aleksandra Felczak,<sup>b</sup> Lilianna Chęcińska,<sup>c</sup> Magdalena Małecka,<sup>c</sup> Katarzyna Lisowska,<sup>b</sup> and Justyn Ochocki<sup>a</sup>

**Electronic Supplementary Information (ESI)**  
*for New Journal of Chemistry*

**Fig. S1**

**Fig. S1** Cotton pads impregnated with 0,025mol/l aqueous solution of the following complexes:  $\text{Ag}(4\text{-CH}_2\text{OHimH})_2\text{NO}_3$  (**1**),  $[\text{Ag}(4\text{-CH}_2\text{OHimH})_2]\text{ClO}_4$  (**2**),  $[\text{Ag}(4\text{-CH}_2\text{OHimH})_2]\text{CF}_3\text{COO}$  (**3**),  $[\text{Ag}(4\text{-CH}_2\text{OHimH})_2]\text{BF}_4$  (**4**),  $[\text{Ag}(4\text{-CH}_2\text{OHimH})_2]\text{SO}_3\text{CH}_3$  (**5**); and the referenced silver salts:  $\text{AgNO}_3$  (**S1**),  $\text{AgClO}_4$  (**S2**),  $\text{AgCF}_3\text{COO}$  (**S3**),  $\text{AgBF}_4$  (**S4**),  $\text{AgSO}_3\text{CH}_3$  (**S5**).

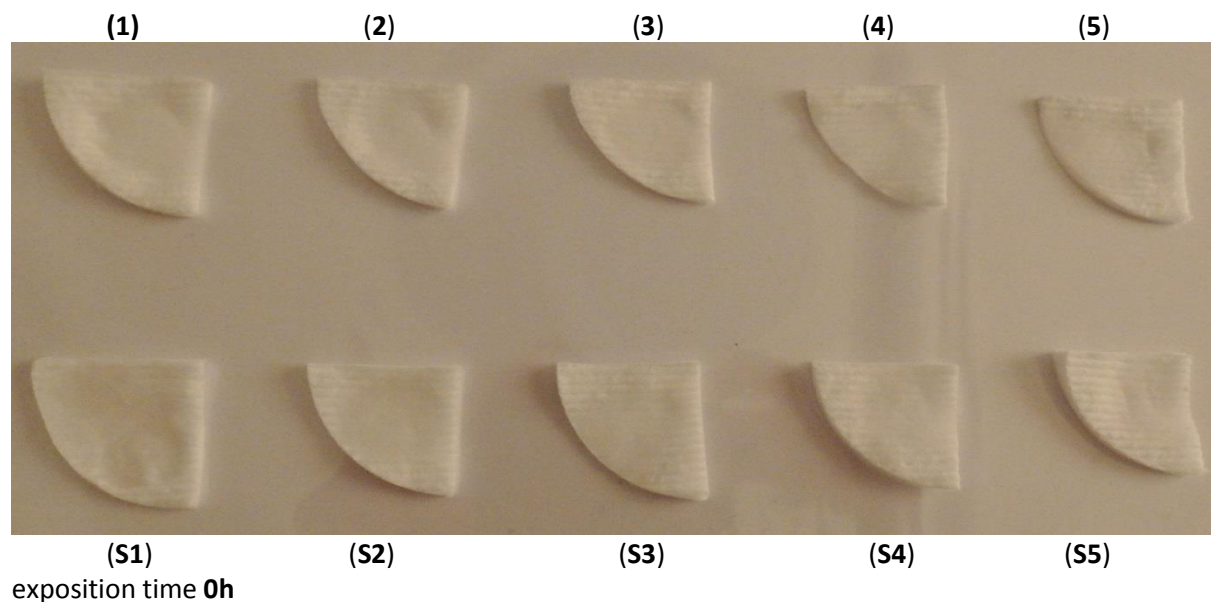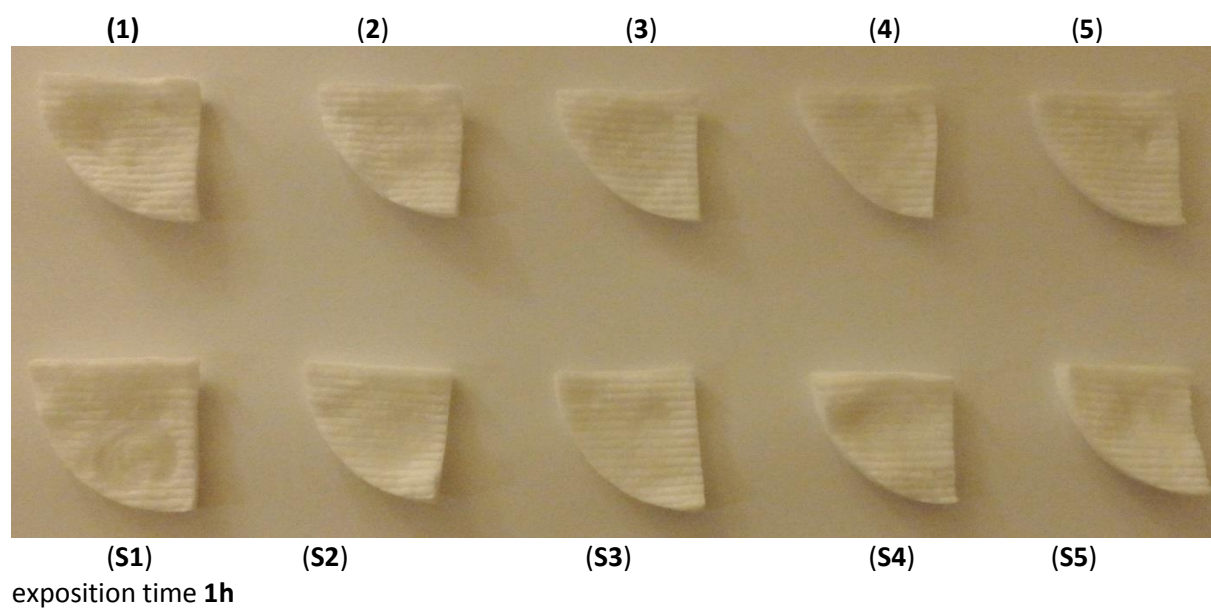

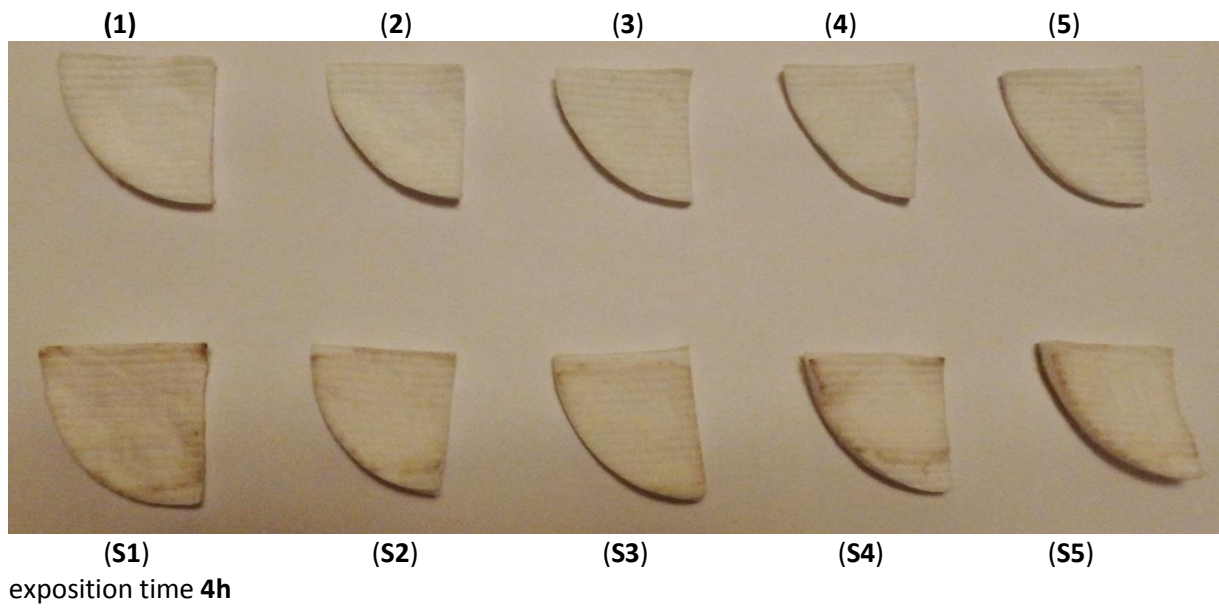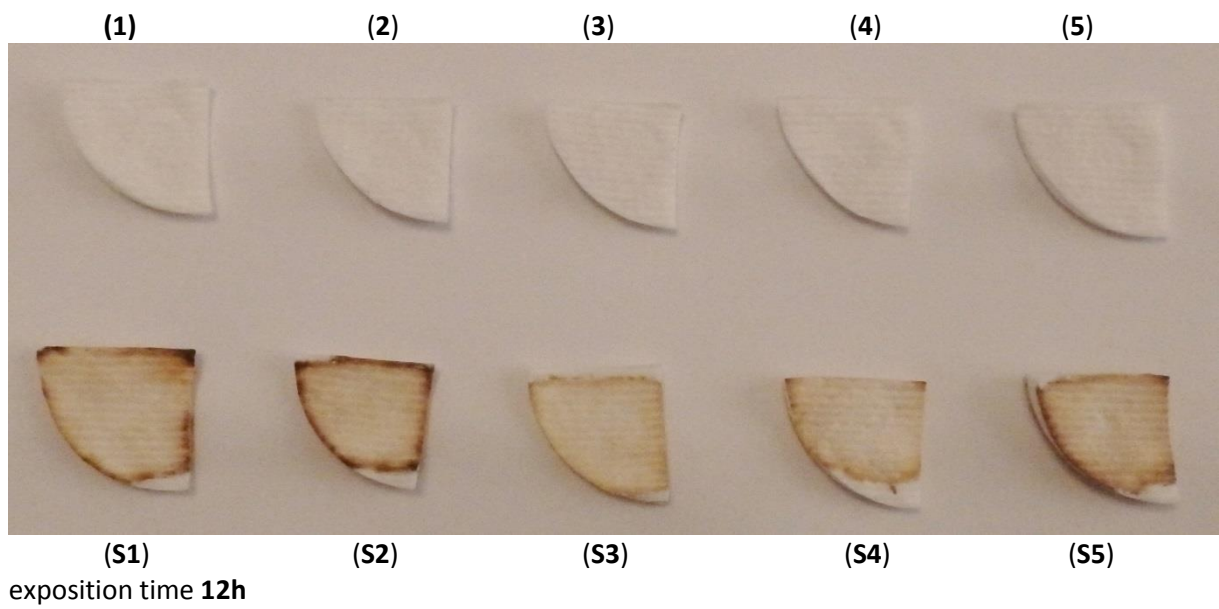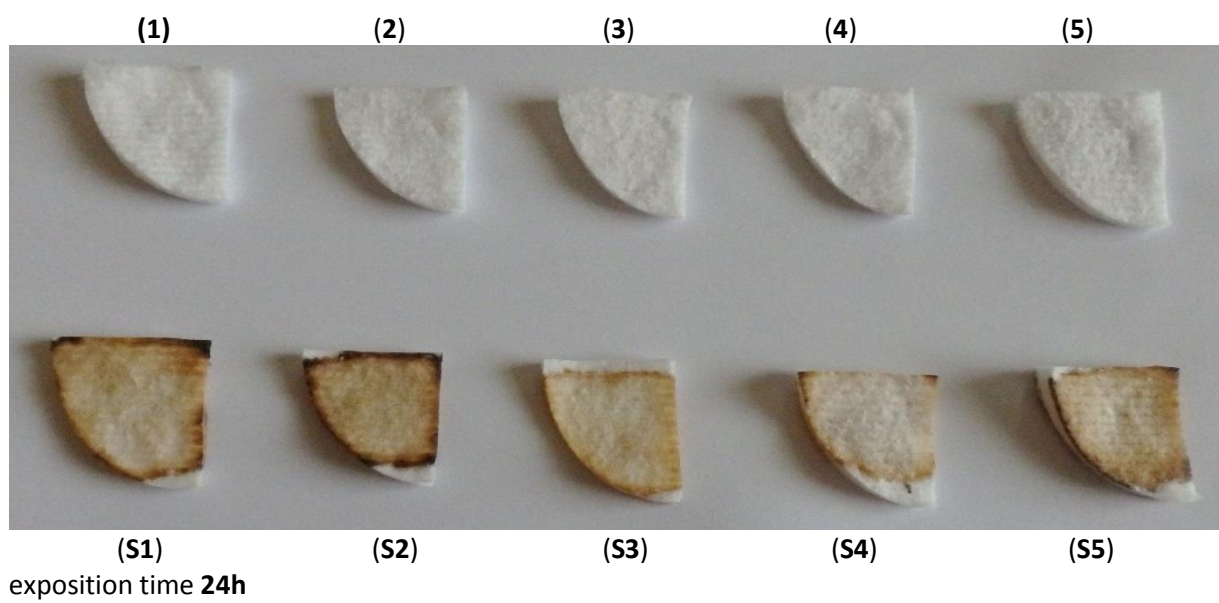

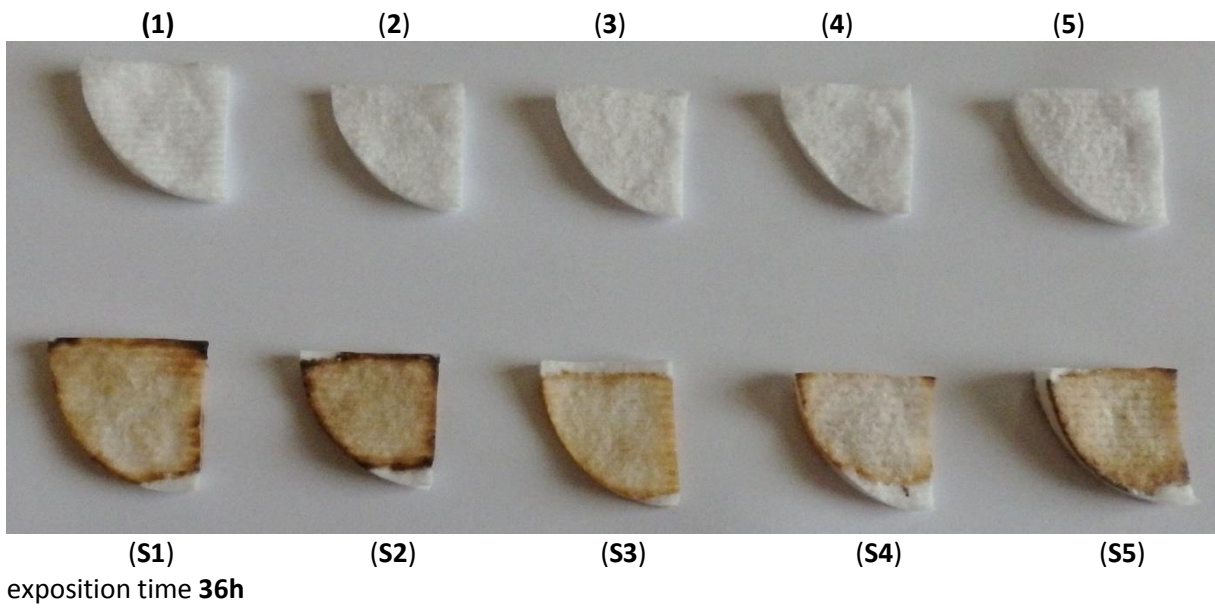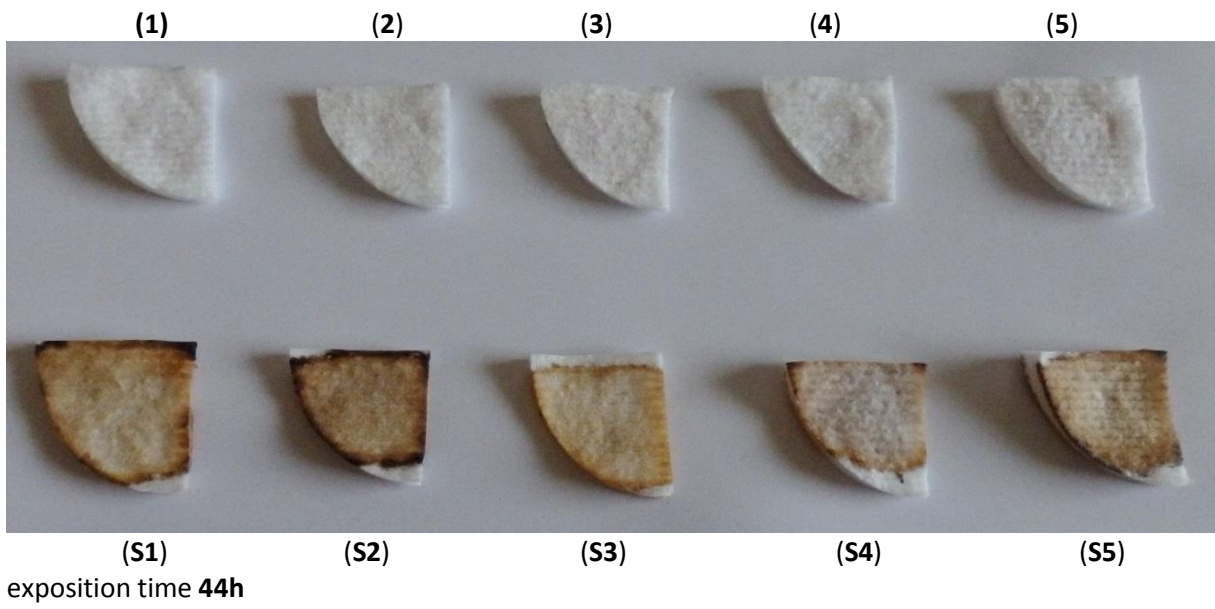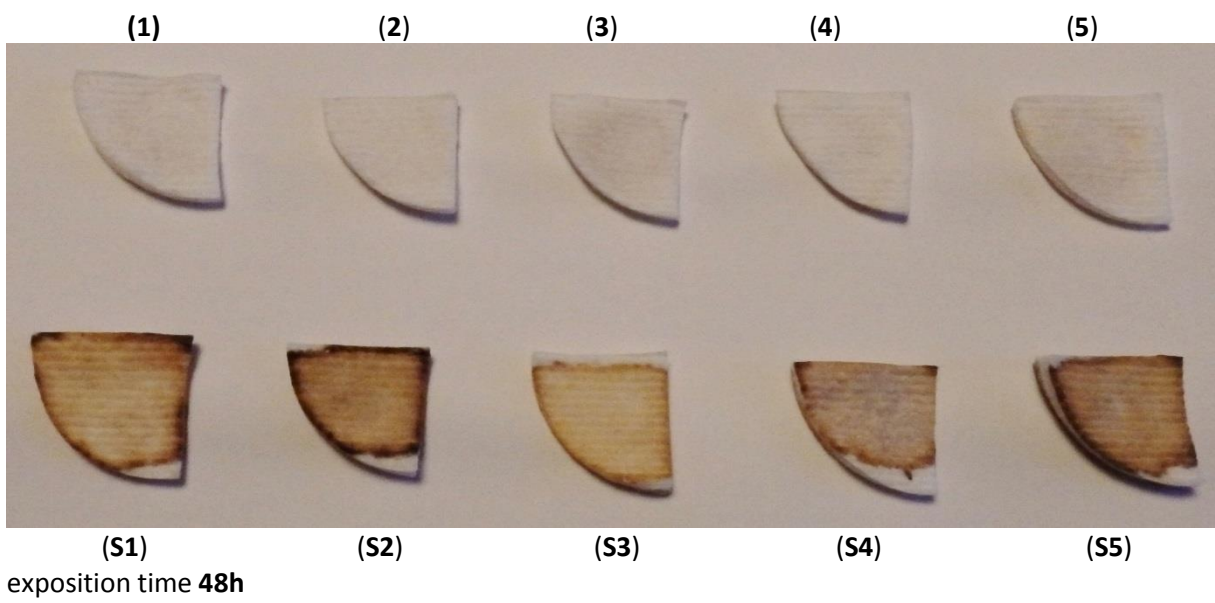

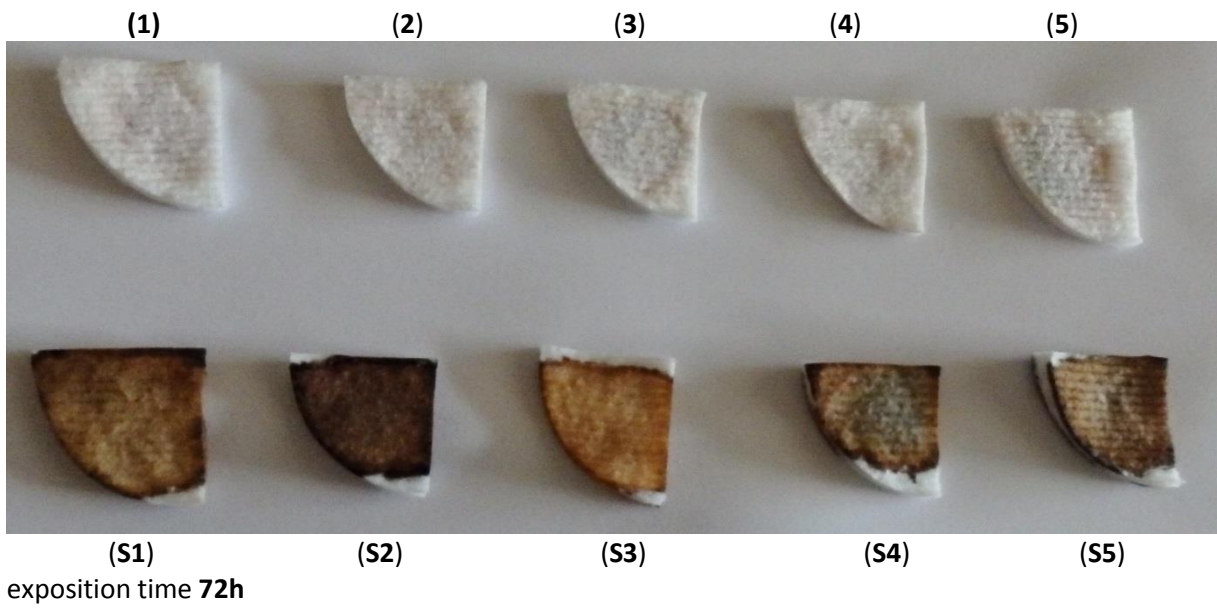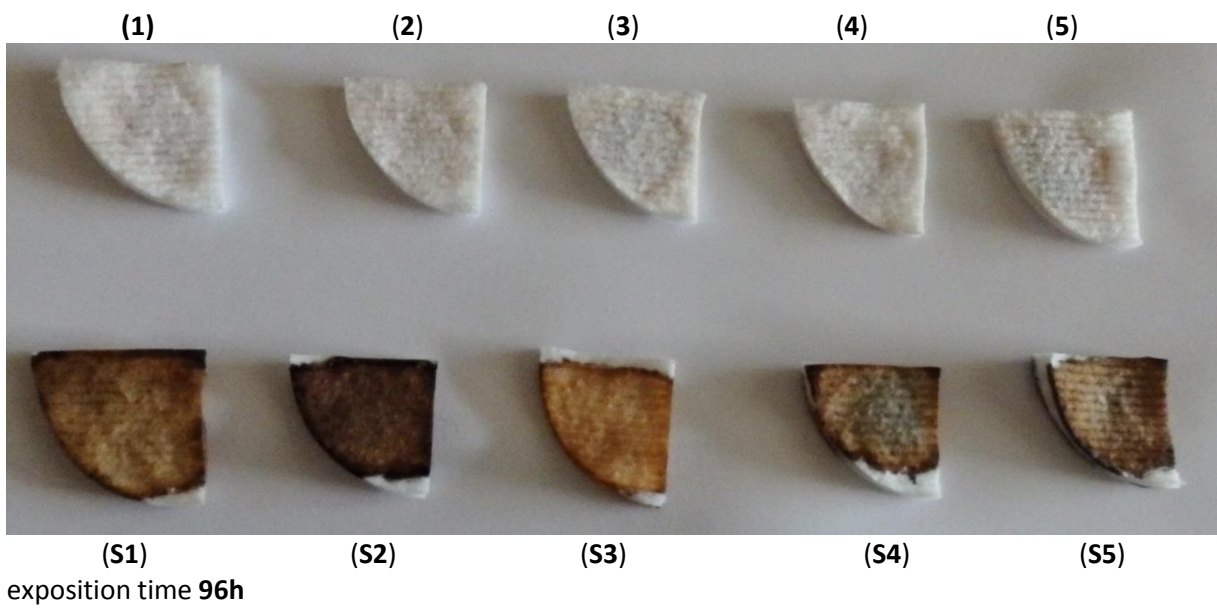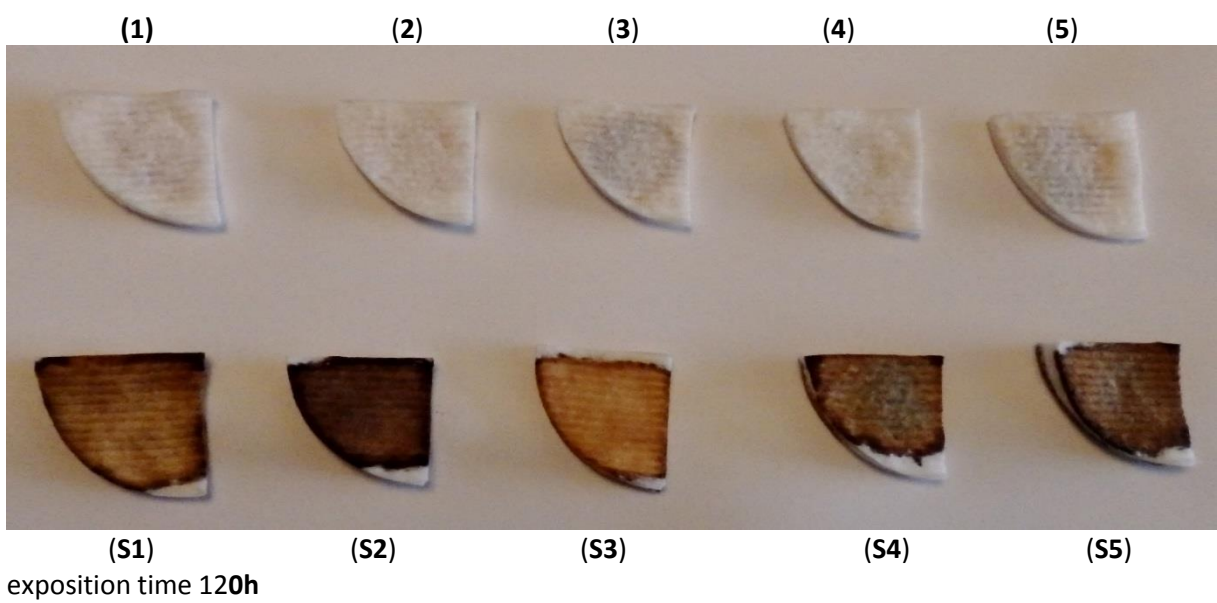

Supplement: c5nj02514a1.pdf [file c5nj02514a1.pdf]
