# Supplementary material for: Influence of selected inorganic counter-ions on the structure and antimicrobial properties of silver(i) complexes with imidazole-containing ligands
Source: Royal Society of Chemistry journal article supplement (doi:10.1039/c5nj02514a), 2015-11-16

**Influence of selected inorganic counter-ions on the structure and antimicrobial properties of silver(I) complexes with imidazole-containing ligand**

Urszula Kalinowska-Lis,<sup>a,\*</sup> Aleksandra Felczak,<sup>b</sup> Lilianna Chęcińska,<sup>c</sup> Magdalena Małecka,<sup>c</sup> Katarzyna Lisowska,<sup>b</sup> and Justyn Ochocki<sup>a</sup>

**Electronic Supplementary Information (ESI)**  
*for New Journal of Chemistry*

**Fig. S2**

**Fig. S2**  $^1\text{H}$  NMR( $\text{D}_2\text{O}$ ) spectra of the free ligand 4(5)- $\text{CH}_2\text{OHimH}$  and silver(I) complexes **1-5**

$^1\text{H}$  NMR( $\text{D}_2\text{O}$ ) spectrum of free ligand 4(5)- $\text{CH}_2\text{OHimH}$  (peak at 4,71 ppm is from  $\text{D}_2\text{O}$ )

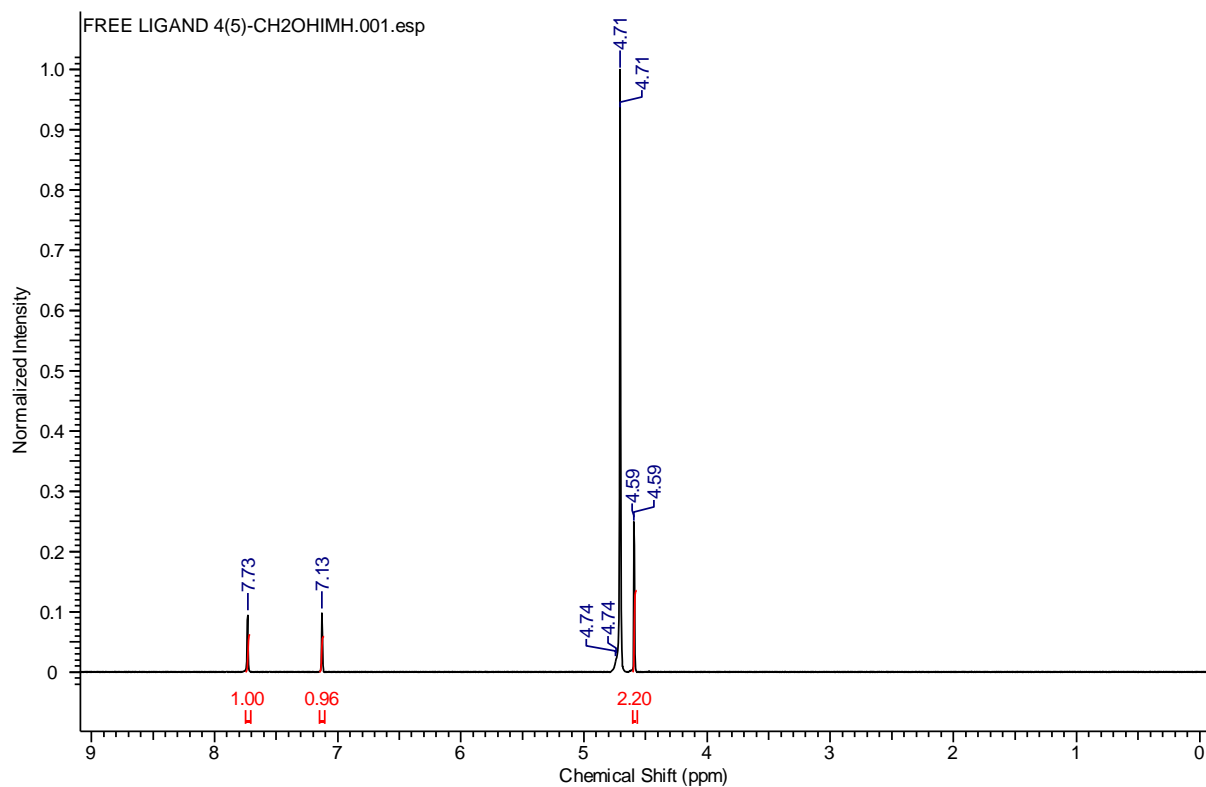

$^1\text{H}$  NMR( $\text{D}_2\text{O}$ ) spectrum of  $[\text{Ag}(4\text{-CH}_2\text{OHimH})_2]\text{NO}_3$  (**1**)

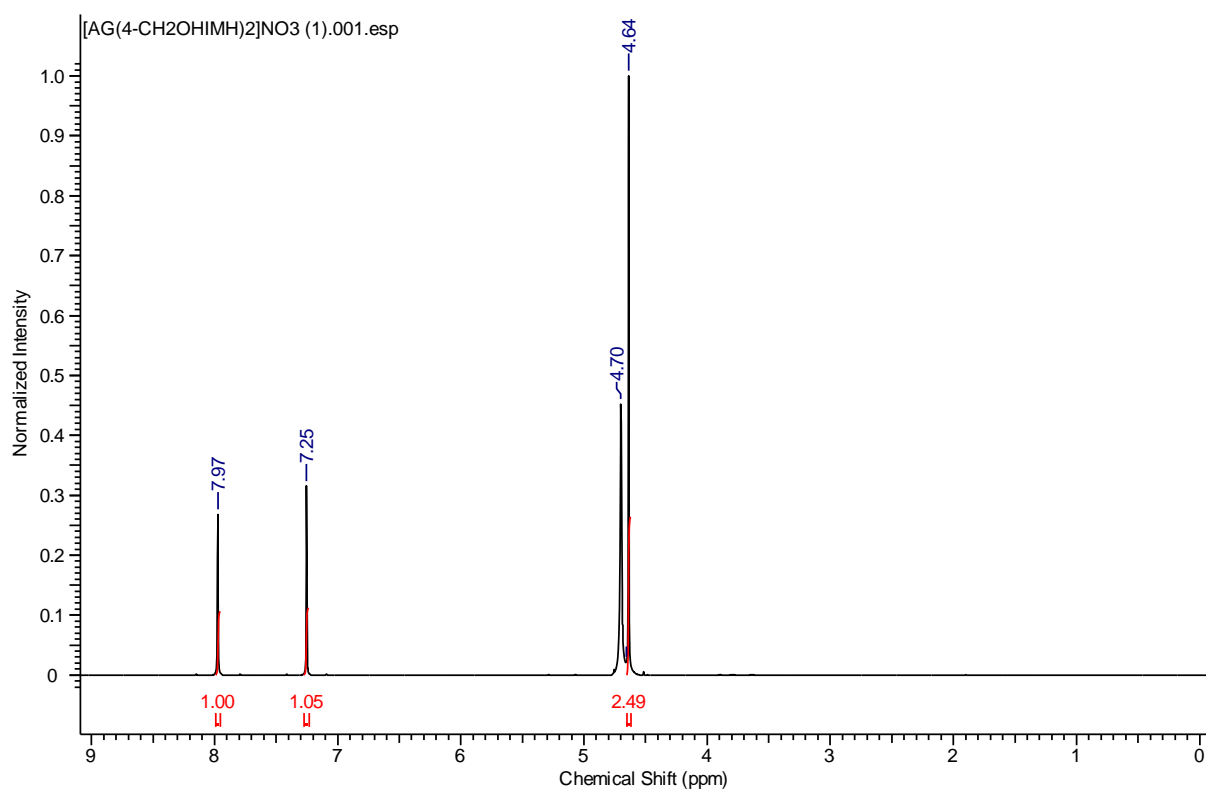

$^1\text{H}$  NMR( $\text{D}_2\text{O}$ ) spectrum of  $[\text{Ag}(\text{4-CH}_2\text{OHimH})_2]\text{ClO}_4$  (**2**)

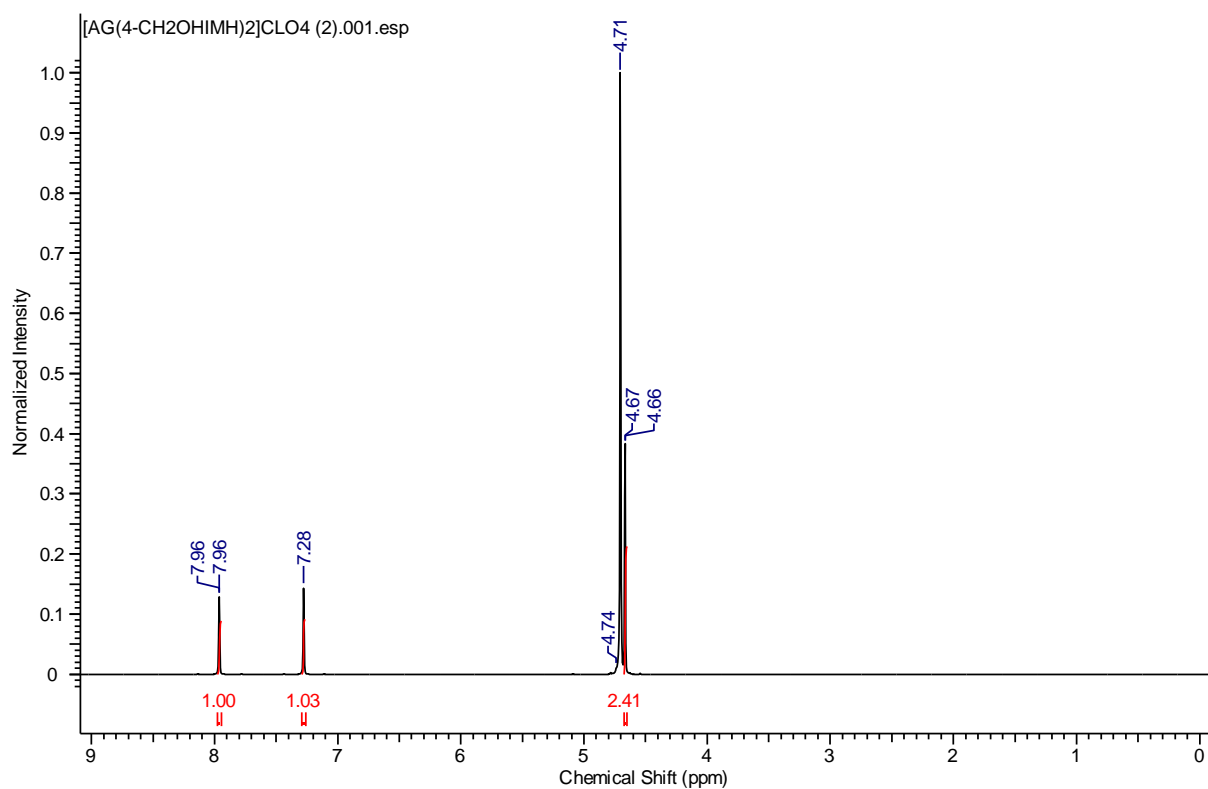

$^1\text{H}$  NMR( $\text{D}_2\text{O}$ ) spectrum of  $[\text{Ag}(\text{4-CH}_2\text{OHimH})_2]\text{CF}_3\text{COO}$  (**3**)

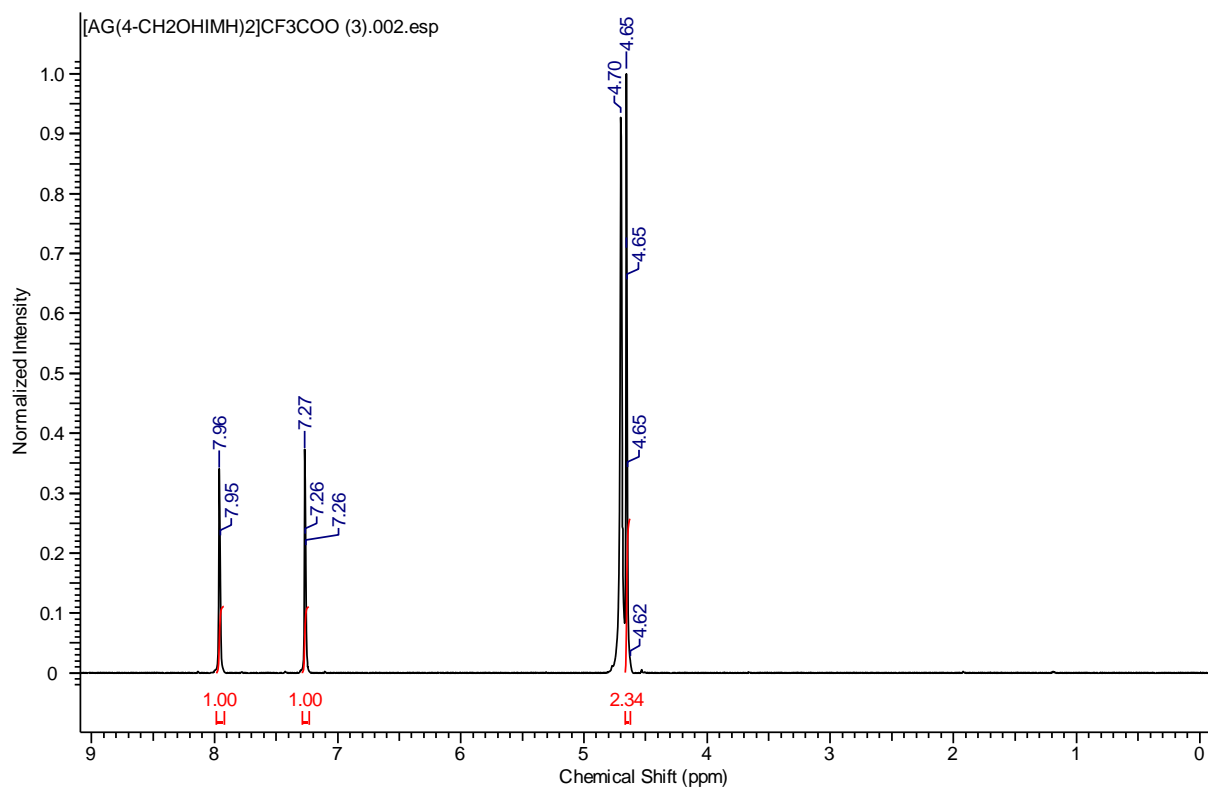

$^1\text{H}$  NMR( $\text{D}_2\text{O}$ ) spectrum of  $[\text{Ag}(\text{4-CH}_2\text{OHimH})_2]\text{BF}_4$  (**4**)

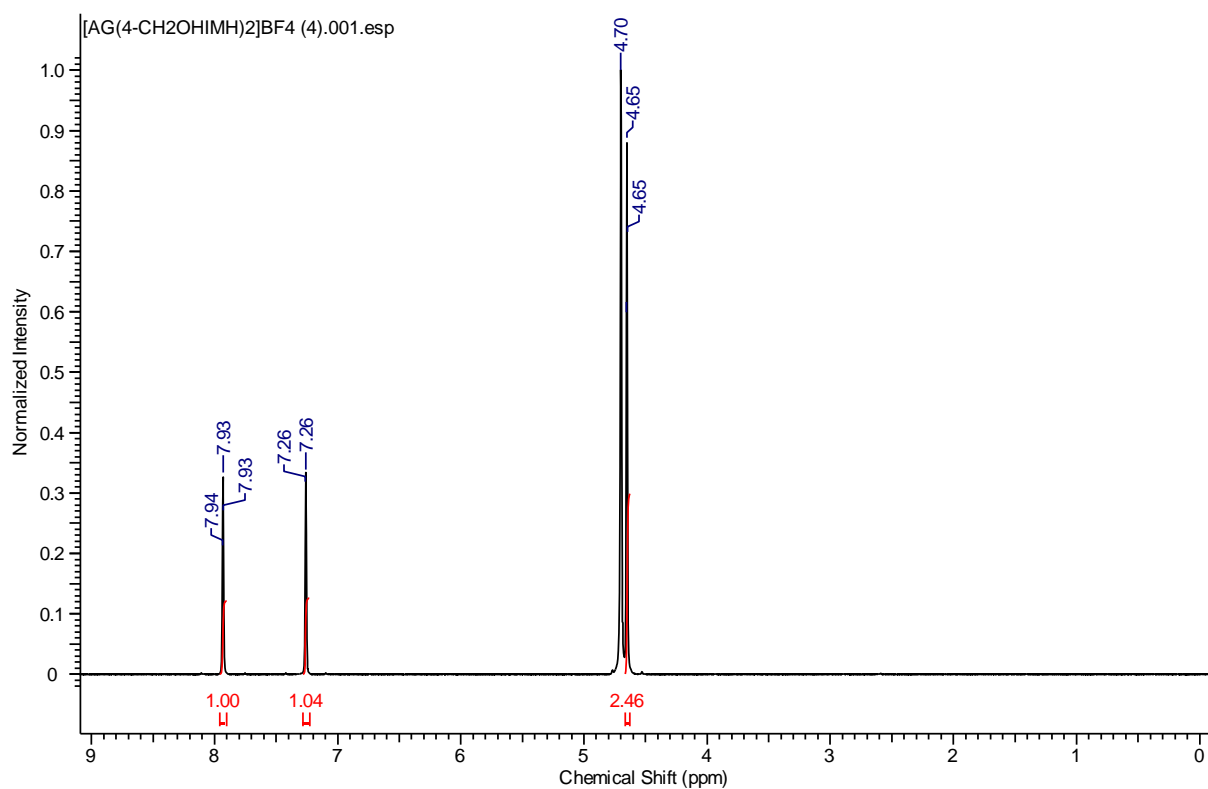

$^1\text{H}$  NMR( $\text{D}_2\text{O}$ ) spectrum of  $[\text{Ag}(\text{4-CH}_2\text{OHimH})_2]\text{SO}_3\text{CH}_3$  (**5**)

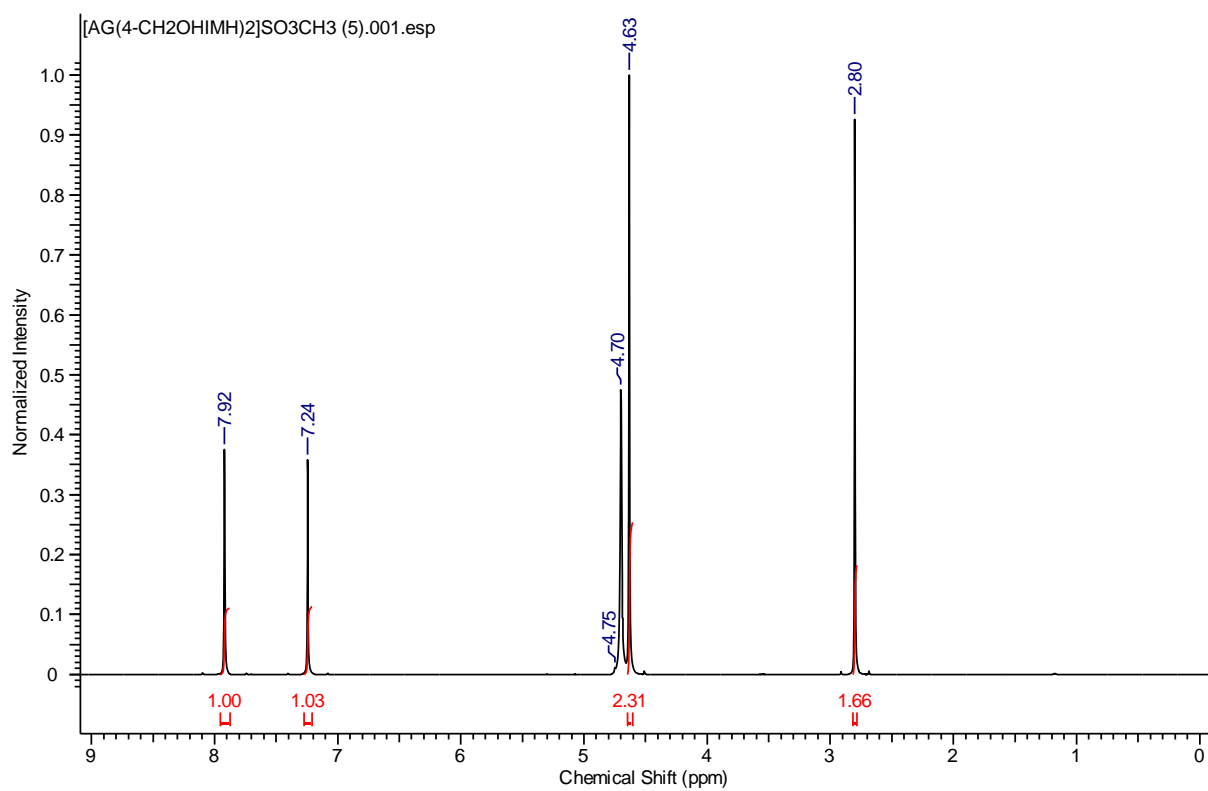

Supplement: c5nj02514a2.pdf [file c5nj02514a2.pdf]
